# Supplementary material
Source: ML conference proceedings conference paper supplement (https://proceedings.mlr.press/v97/atasu19a.html)
Supplement: Supplementary file [file atasu19a-supp.pdf]

## A. Optimality and Effectiveness

Alg. 2 computes an optimum flow  $\mathbf{F}^*$ , whose components are determined by the quantities  $r$  in step 4. Namely, the components of the  $i$ -th row of  $\mathbf{F}^*$ , are given recursively as  $F_{i,s[1]}^* = \min(p_i, q_{s[1]})$  and  $F_{i,s[l]}^* = \min(p_i - \sum_{u=1}^{l-1} F_{i,s[u]}^*, q_{s[l]})$  for  $l = 2, \dots, h_q$ .

**Lemma 1.** *Each row  $i$  of the flow  $\mathbf{F}^*$  of Algorithm 2 has a certain number  $k_i$ ,  $1 \leq k_i \leq h_q$  of nonzero components, which are given by  $F_{i,s[l]}^* = q_{s[l]}$  for  $l = 1, \dots, k_i - 1$  and  $F_{i,s[k_i]}^* = p_i - \sum_{l=1}^{k_i-1} q_{s[l]}$ .*

The Lemma follows by keeping track of the values of the term  $r$  in step 4 in Alg. 2. An immediate implication is that the flow  $F^*$  satisfies the constraints (2) and (4). One can also show that  $F^*$  is a minimal solution of (1) under the constraints (2) and (4), and this leads to the following theorem.

**Theorem 1.** (i) *The flow  $F^*$  of Algorithm 2 is an optimal solution of the relaxed minimization problem given by (1), (2) and (4).* (ii) *ICT provides a lower bound on EMD.*

*Proof.* Proof of part (i): It has already been shown that the flow  $\mathbf{F}^*$  satisfies constraints (2) and (4), and it remains to show that  $\mathbf{F}^*$  achieves the minimum in (1). To this end, let  $\mathbf{F}$  be any nonnegative flow, which satisfies (2) and (4). To show that  $\mathbf{F}^*$  achieves the minimum in (4), it is enough to show that for every row  $i$ , one has  $\sum_j F_{i,j} C_{i,j} \geq \sum_j F_{i,j}^* C_{i,j}$ , which then implies  $\sum_{i,j} F_{i,j} C_{i,j} \geq \sum_{i,j} F_{i,j}^* C_{i,j}$ .

By Alg. 2, there is a reordering given by the list  $\mathbf{s}$  such that

$$C_{i,s[1]} \leq C_{i,s[2]} \leq \dots \leq C_{i,s[n_q]}. \quad (10)$$

By Lemma 1, there is a  $k_i \leq n_q$  such that  $\sum_{l=1}^{k_i} F_{i,s[l]}^* = p_i$  and  $F_{i,s[l]}^* = 0$  for  $l > k_i$ . Furthermore by Lemma 1 and by constraint (4) on  $\mathbf{F}$ , it follows that

$$F_{i,s[l]} \leq q_{s[l]} = F_{i,s[l]}^* \quad \text{for } l = 1, \dots, k_i - 1. \quad (11)$$

The outflow-constraint (2) implies  $\sum_j F_{i,j} = p_i = \sum_j F_{i,j}^*$  or, equivalently,

$$\sum_{l=k_i}^{n_q} F_{i,s[l]} = F_{i,s[k_i]}^* + \sum_{l=1}^{k_i-1} (F_{i,s[l]}^* - F_{i,s[l]}). \quad (12)$$

In the following chain of inequalities, the first inequality follows from (10), and (12) implies the equality in the second step.

$$\begin{aligned} \sum_{l=k_i}^{n_q} C_{i,s[l]} F_{i,s[l]} &\geq C_{i,s[k_i]} \sum_{l=k_i}^{n_q} F_{i,s[l]} \\ &= C_{i,s[k_i]} (F_{i,s[k_i]}^* + \sum_{l=1}^{k_i-1} (F_{i,s[l]}^* - F_{i,s[l]})) \\ &= C_{i,s[k_i]} F_{i,s[k_i]}^* + \sum_{l=1}^{k_i-1} C_{i,s[k_i]} (F_{i,s[l]}^* - F_{i,s[l]}) \\ &\geq C_{i,s[k_i]} F_{i,s[k_i]}^* + \sum_{l=1}^{k_i-1} C_{i,s[l]} (F_{i,s[l]}^* - F_{i,s[l]}). \end{aligned}$$

The inequality in the last step follows from (10) and the fact that the terms  $F_{i,s[l]}^* - F_{i,s[l]}$  are nonnegative by (11). By

rewriting the last inequality, one obtains the desired inequality

$$\begin{aligned} \sum_j F_{i,j} C_{i,j} &= \sum_{l=1}^{n_q} F_{i,s[l]} C_{i,s[l]} \\ &\geq \sum_{l=1}^{k_i} F_{i,s[l]}^* C_{i,s[l]} \\ &= \sum_j F_{i,j}^* C_{i,j}, \end{aligned}$$

where in the last equation  $F_{i,s[l]}^* = 0$  for  $l > k_i$  is used.

Proof of part (ii): Since ICT is a relaxation of the constrained minimization problem of the EMD, ICT provides a lower bound on EMD given by the output of Alg. 2, namely,  $\sum_{i,j} F_{i,j}^* C_{i,j} = \text{ICT}(\mathbf{p}, \mathbf{q}) \leq \text{EMD}(\mathbf{p}, \mathbf{q})$ . □

Similar to Alg. 2, Alg. 3 also determines an optimum flow  $F^*$ , which now depends on the number of iterations  $k$ .

**Lemma 2.** *Each row  $i$  of the flow  $\mathbf{F}^*$  of Algorithm 3 has a certain number  $k_i$ ,  $1 \leq k_i \leq k$  of nonzero components, which are given by  $F_{i,s[l]}^* = q_{s[l]}$  for  $l = 1, \dots, k_i - 1$  and  $F_{i,s[k_i]}^* = p_i - \sum_{l=1}^{k_i-1} q_{s[l]}$ .*

Based on this Lemma, one can show that the flow  $F^*$  from Algorithm 3 is an optimum solution to the minimization problem given by (1), (2) and (4), in which the constraint (4) is further relaxed in function of the predetermined parameter  $k$ . Since the constrained minimization problems for ICT, ACT, OMR, RWMD form a chain of increased relaxations of EMD, one obtains the following result.

**Theorem 2.** *For two normalized histograms  $\mathbf{p}$  and  $\mathbf{q}$ :  $\text{RWMD}(\mathbf{p}, \mathbf{q}) \leq \text{OMR}(\mathbf{p}, \mathbf{q}) \leq \text{ACT}(\mathbf{p}, \mathbf{q}) \leq \text{ICT}(\mathbf{p}, \mathbf{q}) \leq \text{EMD}(\mathbf{p}, \mathbf{q})$ .*

We call a nonnegative cost function  $\mathbf{C}$  *effective*, if for any indices  $i, j$ , the equality  $C_{i,j} = 0$  implies  $i = j$ . For a topological space, this condition is related to the Hausdorff property. For an effective cost function  $\mathbf{C}$ , one has  $C_{i,j} > 0$  for all  $i \neq j$ , and, in this case,  $\text{OMR}(\mathbf{p}, \mathbf{q}) = \sum_{i,j} C_{i,j} F_{i,j}^* = 0$  implies  $F_{i,j}^* = 0$  for  $i \neq j$  and, thus,  $k_i = 1$  in Lemma 2 and, thus,  $\mathbf{F}^*$  is diagonal with  $F_{i,i}^* = p_i$ . This implies  $p_i \leq q_i$  for all  $i$  and, since both histograms are normalized, one must have  $\mathbf{p} = \mathbf{q}$ .

**Theorem 3.** *If the cost function  $\mathbf{C}$  is effective, then  $\text{OMR}(\mathbf{p}, \mathbf{q}) = 0$  implies  $\mathbf{p} = \mathbf{q}$ , i.e., OMR is effective.*

**Remark 1.** *If OMR is effective, then, a fortiori, ACT and ICT are also effective. However, RWMD does not share this property.*

## B. Complexity Analysis

The algorithms presented in Section 3 assume that the cost matrix  $\mathbf{C}$  is given, yet they still have a quadratic time complexity in the size of the histograms. Assume that the histograms size is  $h$ . Then, the size of  $\mathbf{C}$  is  $h^2$ . The complexity is determined by the row-wise reduction operations on  $\mathbf{C}$ . In case of the OMR method, the top-2 smallest values are computed in each row of  $\mathbf{C}$  and a maximum of two updates are performed on each bin of  $\mathbf{p}$ . Therefore, the complexity is  $O(h^2)$ . In case of the ACT method, the top- $k$  smallest values are computed in each row, and up to  $k$  updates are performed on each histogram bin. Therefore, the complexity is  $O(h^2 \log k + hk)$ . The ICT method is the most expensive one because 1) it fully sorts the rows of  $\mathbf{C}$ , and 2) it requires  $O(h)$  iterations in the worst case. Its complexity is given by  $O(h^2 \log h)$ .

In Section 5, the complexity of Phase 1 of the LC-ACT algorithm is  $O(vhm + nh \log k)$  because the complexity of the matrix multiplication that computes  $\mathbf{D}$  is  $O(vhm)$ , and the complexity of computing top- $k$  smallest distances in each row of  $\mathbf{D}$  is  $O(nh \log k)$ . The complexity of performing (6), (7), (8), and (9) are  $O(nh)$  each. When  $k - 1$  iterations of Phase 2 is applied, the overall time complexity of the LC-ACT algorithm is  $O(vhm + knh)$ . Note that when the number of iterations  $k$  performed by LC-ACT is a constant, LC-ACT and LC-RWMD have the same time complexity. When the number of iterations are in the order of the dimensionality of the coordinates (i.e.,  $O(k) = O(m)$ ) and the database is sufficiently large (i.e.,  $O(n) = O(v)$ ), LC-ACT and LC-RWMD again have the same time complexity, which increases linearly in the size of the histograms  $h$ . In addition, the sizes of the matrices  $\mathbf{X}$ ,  $\mathbf{V}$ ,  $\mathbf{D}$ , and  $\mathbf{Z}$  are  $nh$ ,  $vm$ ,  $vh$ , and  $vk$ , respectively. Therefore, the overall space complexity of the LC-ACT algorithm is  $O(nh + vm + vh + vk)$ .
